# Supplementary material
Source: PubMed Central journal article supplement (PMC4538556)
Supplement: AAC.00308-15_zac009154292so1.pdf [file AAC.00308-15_zac009154292so1.pdf]

**Mutations in the F<sub>420</sub> biosynthetic pathway and a nitroreductase enzyme are the primary resistance determinants in spontaneous *in vitro* selected PA-824 mutants of *Mycobacterium tuberculosis***

**SUPPLEMENTARY ELECTRONIC MATERIAL**

Hana Haver<sup>1,2</sup>, Adeline Chua<sup>1±</sup>, Pramila Ghode<sup>1,3±</sup>, Suresh B. Lakshminarayana<sup>1</sup>, Amit Singhal<sup>4</sup>, Barun Mathema<sup>5</sup>, René Wintjens<sup>6</sup>, Pablo Bifani<sup>1\*</sup>

<sup>1</sup>Novartis Institute for Tropical Diseases, Singapore.

<sup>2</sup>Department of Microbiology and Immunology Program, Yong Loo Lin School of Medicine, Life Sciences Institute, National University of Singapore, Singapore.

<sup>3</sup>Department of Biological Sciences, Faculty of Science, National University of Singapore, Singapore.

<sup>4</sup>Singapore Immunology Network (SIGN), A\*Star, Singapore.

<sup>5</sup>Department of Epidemiology, Mailman School of Public Health, Columbia University, New York, NY.

<sup>6</sup>Laboratory of Biopolymers and Supramolecular Nanomaterials (CP206/04), Université Libre de Bruxelles, B-1050 Brussels, Belgium.

\*Correspondence: [pablo.bifani@novartis.com](mailto:pablo.bifani@novartis.com)

±These two authors have contributed equally.

1 **Supplementary Table S1: Target genes and primers.**

| Gene   | Protein | Length (aa) | Function                                                                                                                                                                                                                                                                              | Pathway                                                       | Primers                                                                                                                                                                                                                                                                                                                                                                                                                             |
|--------|---------|-------------|---------------------------------------------------------------------------------------------------------------------------------------------------------------------------------------------------------------------------------------------------------------------------------------|---------------------------------------------------------------|-------------------------------------------------------------------------------------------------------------------------------------------------------------------------------------------------------------------------------------------------------------------------------------------------------------------------------------------------------------------------------------------------------------------------------------|
| Rv3547 | DDN     | 151         | F <sub>420</sub> -dependent nitroreductase                                                                                                                                                                                                                                            | F <sub>420</sub>                                              | sRV3527F- 5' gcaccgaccagagcctcgcgctg 3'<br>sRv3527R- 5' cgcctggtcttcacgttcg 3'                                                                                                                                                                                                                                                                                                                                                      |
| Rv0407 | FGD1    | 336         | F <sub>420</sub> -dependent glucose-6-phosphate dehydrogenase                                                                                                                                                                                                                         | Pentose phosphate pathway (oxidative branch)                  | sRv0407AF- 5' gcgggtcgcgtttatggc 3'<br>sRv0407AR- 5' cgggcacgtcgtatgacg 3'<br>sRv0407BF- 5' ggtggggcctaagcggcagc 3'<br>sRv0407BR- 5' gcagagagcccgtaatcggc 3'                                                                                                                                                                                                                                                                        |
| Rv3261 | FBIA    | 331         | Catalyzes the transfer of the 2-phospholactate moiety from lactyl (2) diphospho-(5')guanosine (LPPG) to 7,8-didemethyl-8-hydroxy-5-deazariboflavin (FO) with the formation of the L-lactyl phosphodiester of 7,8-didemethyl-8-hydroxy-5-deazariboflavin (F <sub>420</sub> -0) and GMP | Cofactor biosynthesis; coenzyme F <sub>420</sub> biosynthesis | sRv3261F1: 5' gcggttctgtgtggttggg 3'<br>sRv3261R1-1: 5' gcatgatgatcggcgtcgg 3'<br>sRv3261F1-1: 5' gccaccgacgacctgtgcaaaccc 3'<br>sRv3261R1: 5' ccgatgacggcgaggatctcgatgg 3'                                                                                                                                                                                                                                                         |
| Rv3562 | FBIB    | 448         | Catalyzes the GTP-dependent successive addition of multiple gamma-linked L-glutamates to the L-lactyl phosphodiester of 7,8-didemethyl-8-hydroxy-5-deazariboflavin (F <sub>420</sub> -0) to form polyglutamated F <sub>420</sub> derivatives                                          | Cofactor biosynthesis; coenzyme F <sub>420</sub> biosynthesis | sFBiBF3: 5' ggtgccgtgctgatgaccgacc 3'<br>sFBiBR1: 5' cgaccagctcgagcgttcgg 3'<br>sRv3262F1-1: 5' gccgcccactgtgcaaaaggc 3'<br>sRv3262R1: 5' cgcggtgaattgatccgctggg 3'                                                                                                                                                                                                                                                                 |
| Rv1173 | FBIC    | 856         | Catalyzes the radical-mediated transfer of the hydroxybenzyl group from 4-hydroxyphenylpyruvate (HPP) to 5-amino-6-ribitylamino-2,4(1H,3H)-pyrimidinedione to form 7,8-didemethyl-8-hydroxy-5-deazariboflavin (FO)                                                                    | Cofactor biosynthesis; coenzyme F <sub>420</sub> biosynthesis | sRv1173FP1- 5' cctctcacggatggtatcgc 3'<br>sRv1173RP1- 5' cgtcgaggatctcgtcgggtcc 3'<br>sRv1173FP2- 5' ggtgttatcccgtcaccggg 3'<br>sRv1173RP2- 5' ccttggcgggaagtctctcagc 3'<br>sRv1173FP3- 5' cgcgccgatacgttatcagc 3'<br>sRv1173RP3- 5' ccgatcgaggggcggaagc 3'<br>sRv1173FP4- 5' gggaatcgatccgagcagg 3'<br>sRv1173RP4- 5' ccagcgaacctcgtctccagg 3'<br>sRv1173FP5- 5' gcgtcaccaagagcgggc 3'<br>sRv1173RP5- 5' cgtcgggggctagccagattgc 3' |

**Supplementary Table S2: Mutations on *fbiABC* genes**

| <b>Gene Rv1173/ <i>fbiC</i></b>                |                         |       |       |                                                         |
|------------------------------------------------|-------------------------|-------|-------|---------------------------------------------------------|
| Nucleotide                                     | Amino acid (aa)         | Freq. | *Conc | Comments                                                |
| Change                                         | Change                  |       |       |                                                         |
| <sup>148</sup> G>C                             | <sup>50</sup> Ala→Pro   | 1     | 1     | Single nucleotide substitution                          |
| <sup>155</sup> ΔG                              | <sup>52</sup> Gly→Val   | 1     | 1     | Single nucleotide deletion →Frame-shift                 |
| <sup>160/161</sup> GA>AT                       | <sup>54</sup> Glu→Met   | 1     | 5     | Dinucleotide substitution.                              |
| <sup>258</sup> T>G                             | <sup>86</sup> Tyr→STOP  | 1     | 1     | Single nucleotide substitution →Early termination codon |
| <sup>271</sup> T>G                             | <sup>91</sup> Phe→Val   | 1     | 1     | Single nucleotide substitution                          |
| <sup>313</sup> T>C                             | <sup>105</sup> Cys→Arg  | 1     | 5     | Single nucleotide substitution                          |
| <sup>569</sup> A>G                             | <sup>190</sup> His→Arg  | 1     | 5     | Single nucleotide substitution                          |
| <sup>604</sup> T>C                             | <sup>202</sup> Ser→Pro  | 1     | 1     | Single nucleotide substitution                          |
| <sup>611</sup> T>C                             | <sup>204</sup> Leu→Pro  | 1     | 1     | Single nucleotide substitution                          |
| <sup>628</sup> T>C                             | <sup>210</sup> Ser→Pro  | 1     | 1     | Single nucleotide substitution                          |
| <sup>647</sup> A>C                             | <sup>216</sup> Glu→Ala  | 1     | 1     | Single nucleotide substitution                          |
| <sup>818</sup> C>G                             | <sup>273</sup> Thr→Arg  | 1     | 1     | Single nucleotide substitution                          |
| <sup>830</sup> ΔA                              | <sup>277</sup> Ile→Asn, | 1     | 1     | Single nucleotide insertion → Frame-shift               |
| <sup>847</sup> ΔG                              | <sup>283</sup> Glu→Gly  | 1     | 5     | Single nucleotide insertion → Frame-shift               |
| <sup>1008</sup> C>G                            | <sup>336</sup> Asn→Lys  | 1     | 5     | Single nucleotide substitution                          |
| <sup>1066</sup> G>T                            | <sup>356</sup> Gly→Cys  | 1     | 1     | Single nucleotide substitution                          |
| <sup>1072</sup> T>G                            | <sup>358</sup> Ser→Ala  | 1     | 1     | Single nucleotide substitution                          |
| <sup>1114</sup> C>T                            | <sup>372</sup> Pro→Ser  | 3     | 5     | Single nucleotide substitution                          |
| <sup>1154</sup> G>T                            | <sup>385</sup> Gly→Val  | 1     | 1     | Single nucleotide substitution                          |
| <sup>1159</sup> G>T                            | <sup>387</sup> Asp→Tyr  | 2     | 1/5   | Single nucleotide substitution                          |
| <sup>1891</sup> C>T                            | <sup>631</sup> His→Tyr  | 1     | 1     | Single nucleotide substitution                          |
| <sup>2124</sup> G>A                            | <sup>708</sup> Met→Ile  | 2     | 5     | Single nucleotide substitution                          |
| <sup>2127/28</sup> ΔGT                         | <sup>709</sup> Met→Ile  | 1     | 5     | Dinucleotide deletion →Frame-shift                      |
| <sup>2131</sup> G>T                            | <sup>711</sup> Gly→Trp  | 1     | 5     | Single nucleotide substitution                          |
| <sup>2133</sup> ΔG                             | <sup>711</sup> Gly→Gly  | 1     | 1     | Single nucleotide deletion →Frame-shift                 |
| <sup>2143</sup> A>C                            | <sup>715</sup> Ser→Arg  | 1     | 1     | Single nucleotide substitution                          |
| <sup>2156</sup> G>T                            | <sup>719</sup> Trp→Leu  | 1     | 5     | Single nucleotide substitution                          |
| <sup>2159</sup> T>G                            | <sup>720</sup> Val→Gly  | 1     | 1     | Single nucleotide substitution                          |
| <sup>2158</sup> G>A                            | <sup>720</sup> Val→Ile  | 3     | 1     | Single nucleotide substitution                          |
| <sup>2165</sup> A>G                            | <sup>722</sup> His→Arg  | 1     | 5     | Single nucleotide substitution                          |
| <sup>2158</sup> G>A                            | <sup>720</sup> Val→Ile  | 1     | 1     | Single nucleotide substitution                          |
| <sup>2274</sup> ΔG                             | <sup>758</sup> Arg→Arg  | 1     | 5     | Single nucleotide insertion → Frame-shift               |
| <sup>2374</sup> ΔCAGACC<br>AGCTGGGTG<br>AAACTT | <sup>Δ792</sup> QTSWVKL | 1     | 5     | Repeat of preceding 7 aa, in-frame insertions           |
| <sup>2399</sup> T>G                            | <sup>800</sup> Leu→Arg  | 1     | 5     | Single nucleotide substitution                          |
| <sup>2549</sup> ΔC                             | <sup>843</sup> Thr→Thr  | 4     | 5     | Single nucleotide insertion → Frame-shift               |
| <sup>2734</sup> ΔAACTT                         | <sup>912</sup> ΔAACTT   | 1     | 1     | Five nucleotide insertion → Frame-shift                 |
| <sup>491</sup> ΔAACGGG<br>G                    | <sup>164</sup> Glu→Ala  | 1     | 5     | Seven nucleotide deletion →Frame-shift                  |
| <sup>2158</sup> G>A                            | <sup>720</sup> Val→Ile  | 1     | 5     | Single nucleotide substitution                          |

**Total number of *fbiC* mutants 47**

\*Conc: concentration used to select mutant.

**Gene Rv3261/ *fbiA***

| Nucleotide Change                          | Amino acid Change       | acid | Freq.     | *Con (μM) | Comments                                               |
|--------------------------------------------|-------------------------|------|-----------|-----------|--------------------------------------------------------|
| <sup>62</sup> A>C                          | <sup>21</sup> Gln→Pro   |      | 1         | 1         | Single nucleotide substitution                         |
| <sup>145</sup> G>T                         | <sup>43</sup> Asp→Tyr   |      | 1         | 1         | Single nucleotide substitution                         |
| <sup>167</sup> T>C                         | <sup>56</sup> Leu→Pro   |      | 1         | 1         | Single nucleotide substitution                         |
| <sup>188</sup> A>G                         | <sup>63</sup> Asp→Gly   |      | 2         | 1/5       | Single nucleotide substitution                         |
| <sup>195</sup> C>G                         | <sup>65</sup> Cys→Trp   |      | 1         | 5         | Single nucleotide substitution                         |
| <sup>211</sup> ΔG                          | <sup>71</sup> Gly→Ala   |      | 2         | 5         | Single nucleotide deletion →Frame-shift                |
| <sup>222</sup> ΔC                          | <sup>74</sup> Asp→Asp   |      | 1         | 5         | Single nucleotide deletion →Frame-shift                |
| <sup>227</sup> ΔC                          | <sup>76</sup> Gln→Pro   |      | 1         | 5         | Single nucleotide insertion →Frame-shift               |
| <sup>237</sup> G>A                         | <sup>79</sup> Trp→STOP  |      | 2         | 5         | Single nucleotide substitution→Early termination codon |
| <sup>242</sup> ΔC                          | <sup>81</sup> Gln→Pro   |      | 1         | 5         | Single nucleotide insertion →Frame-shift               |
| <sup>263</sup> C>A                         | <sup>88</sup> Ala→Asp   |      | 1         | 5         | Single nucleotide substitution                         |
| <sup>337</sup> ΔT                          | <sup>113</sup> Leu→Ser  |      | 1         | 1         | Single nucleotide insertion →Frame-shift               |
| <sup>349</sup> ΔC                          | <sup>117</sup> Gln→Pro  |      | 1         | 1         | Single nucleotide deletion →Frame-shift                |
| <sup>356</sup> T>C                         | <sup>119</sup> Leu→Pro  |      | 1         | 1         | Single nucleotide substitution                         |
| <sup>376</sup> T>C                         | <sup>126</sup> Ser→Pro  |      | 1         | 1         | Single nucleotide substitution                         |
| <sup>406</sup> T>C                         | <sup>136</sup> Trp→Arg  |      | 2         | 5         | Single nucleotide substitution                         |
| <sup>436</sup> A>G                         | <sup>146</sup> Thr→Ala  |      | 1         | 1         | Single nucleotide substitution                         |
| <sup>899</sup> ΔGGGTGA                     | <sup>164</sup> Gly →Gly |      | 1         | 5         | Single nucleotide deletion →Frame-shift                |
| <sup>899</sup> ΔCG                         |                         |      |           |           |                                                        |
| <sup>899</sup> ΔG                          | <sup>164</sup> Gly →Gly |      | 1         | 5         | Single nucleotide deletion →Frame-shift                |
| <sup>514</sup> T>C                         | <sup>172</sup> Trp→Arg  |      | 1         | 1         | Single nucleotide substitution                         |
| <sup>563</sup> ΔT                          | <sup>188</sup> Val→Val  |      | 2         | 1         | Single nucleotide insertion →Frame-shift               |
| <sup>575</sup> ΔA                          | <sup>192</sup> Lys→Lys  |      | 1         | 1         | Single nucleotide insertion →Frame-shift               |
| <sup>575</sup> ΔA                          | <sup>192</sup> Lys→Ser  |      | 1         | 1         | Single nucleotide deletion →Frame-shift                |
| <sup>713</sup> C>A                         | <sup>238</sup> Ala→Glu  |      | 1         | 1         | Single nucleotide substitution                         |
| <sup>747</sup> AA>GT                       | <sup>249</sup> Glu→Glu  |      | 1         | 1         | Dinucleotide substitution→Frame-shift                  |
| <sup>775</sup> T>C                         | <sup>259</sup> Cys→Arg  |      | 2         | 1         | Single nucleotide substitution                         |
| <sup>847</sup> G>A                         | <sup>283</sup> Gly→Arg  |      | 2         | 1         | Single nucleotide substitution                         |
| <sup>968</sup> G>T                         | <sup>323</sup> Gly→Val  |      | 1         | 1         | Single nucleotide substitution                         |
| <b>Total number of <i>fbiA</i> mutants</b> |                         |      | <b>35</b> |           |                                                        |

**Rv3262/*fbiB***

| Nucleotide Change                          | Amino acid Change      | acid | Freq.    | *Con (μM) | Comments                                               |
|--------------------------------------------|------------------------|------|----------|-----------|--------------------------------------------------------|
| <sup>Δ36</sup> GGCTCCG<br>CCTCGACC<br>AT   | Frame-shift            |      | 1        | 5         | Seventeen nucleotide insertions → Frame-shift          |
| <sup>117</sup> G>A                         | <sup>39</sup> Trp→STOP |      | 1        | 5         | Single nucleotide substitution→Early termination codon |
| <sup>458</sup> G>T                         | <sup>153</sup> Gly→Val |      | 1        | 1         | Single nucleotide substitution                         |
| <sup>1081</sup> C>G                        | <sup>361</sup> Pro→Ala |      | 1        | 5         | Single nucleotide substitution                         |
| <b>Total number of <i>fbiB</i> mutants</b> |                        |      | <b>4</b> |           |                                                        |

\*Conc: concentration used to select mutant.

**Supplementary Figure S1:** Schematic 2D interacting plot of F<sub>420</sub> cofactor in the crystal structure of Ddn. Hydrogen bonds (green dashed lines) and van der Waals contacts (red semi-circles with radiating spokes). Color scheme: carbon in dark, nitrogen in blue, oxygen in red and sulfur in yellow. The image was obtained with LigPlot program<sup>1</sup>.

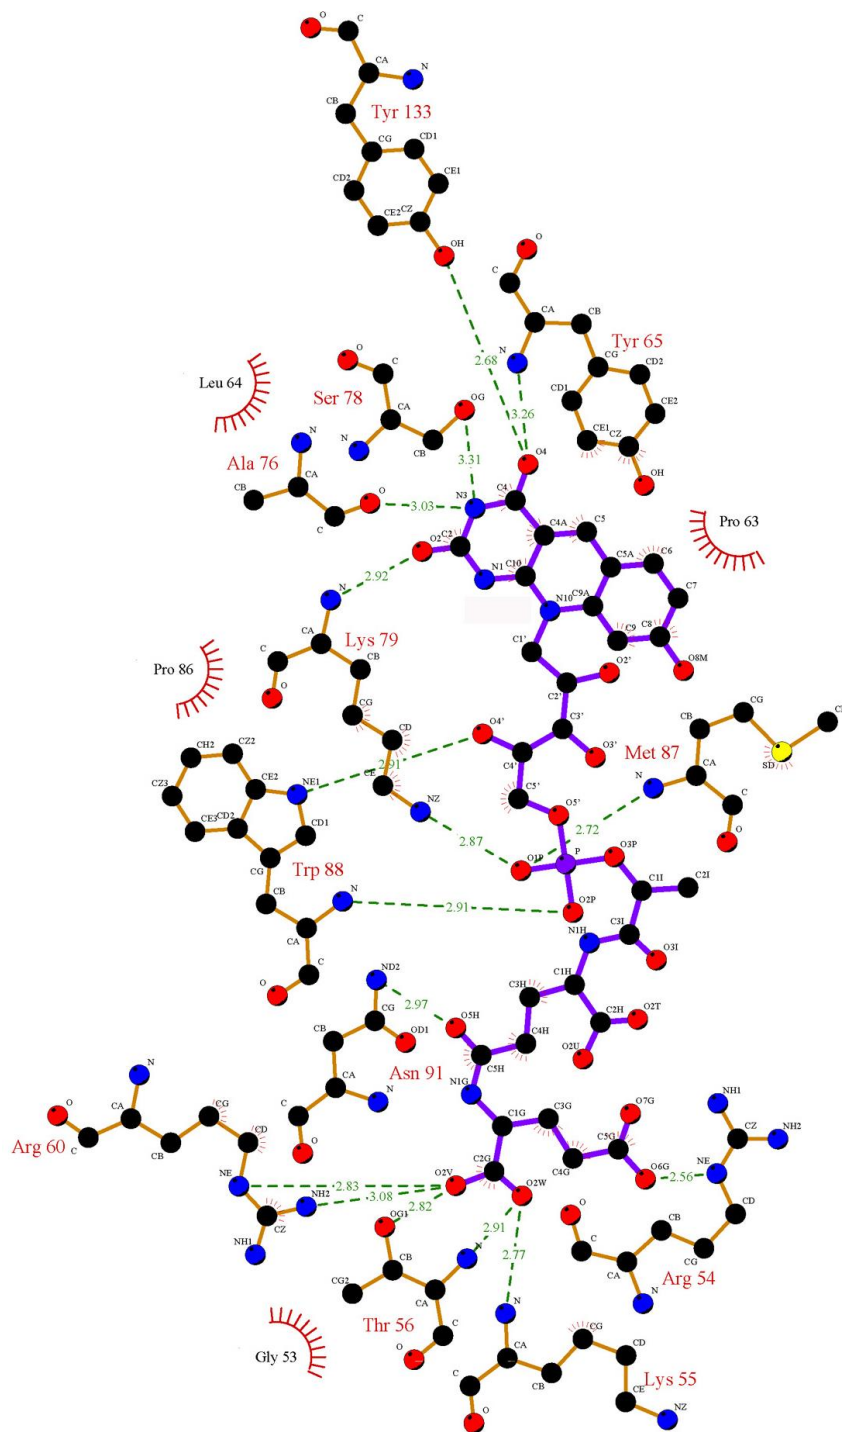

<sup>1</sup>Wallace AC, Laskowski RA, Thornton JM. LIGPLOT: a program to generate schematic diagrams of protein-ligand interactions. *Protein engineering* 1995; **8**: 127-34.

**Supplementary Table S3: Minimum Inhibitory Concentration (MIC<sub>99</sub>)**

| Gene                                                                 | Mutation                              | MIC <sub>99</sub> (μM) |
|----------------------------------------------------------------------|---------------------------------------|------------------------|
| <i>ddn</i> (3547)                                                    | <sup>11</sup> Ser > Stop (15 samples) | >10                    |
|                                                                      | <sup>22</sup> Ser > Leu               | >1<5                   |
|                                                                      | <sup>25</sup> Asn > Ile               | >10                    |
|                                                                      | <sup>48</sup> Leu > Pro               | >5<10                  |
|                                                                      | <sup>78</sup> Ser > Pro               | >10                    |
|                                                                      | <sup>88</sup> Trp > Arg               | >10                    |
|                                                                      | <sup>137</sup> Gln > Stop             | >10                    |
| <i>fgd1</i> (0407)                                                   | <sup>143</sup> Trp > Stop             | >10                    |
|                                                                      | <sup>169</sup> Gly > Ala              | >5<10                  |
|                                                                      | <sup>230</sup> Glu > Lys              | >10                    |
| <i>fbiC</i> (1173)                                                   | <sup>52</sup> C-deletion              | >10                    |
|                                                                      | <sup>86</sup> Tyr > Stop              | >10                    |
|                                                                      | <sup>105</sup> Cys > Arg              | >10                    |
|                                                                      | <sup>164</sup> AACGGG-deletion        | >10                    |
|                                                                      | <sup>336</sup> Asn > Lys              | >10                    |
|                                                                      | <sup>708</sup> Met > Ile              | >5<10                  |
|                                                                      | <sup>709</sup> GT-deletion            | >10                    |
|                                                                      | <sup>720</sup> Val > Ile              | >10                    |
| <i>fbiA</i> (3261)                                                   | <sup>43</sup> Asp > Tyr               | >10                    |
|                                                                      | <sup>56</sup> Leu > Pro               | >10                    |
|                                                                      | <sup>71</sup> G-deletion              | >10                    |
|                                                                      | <sup>74</sup> C-deletion              | >10                    |
|                                                                      | <sup>81</sup> C-insertion             | >10                    |
|                                                                      | <sup>119</sup> Leu > Pro              | >10                    |
| <i>fbiB</i> (3262)                                                   | Nil tested                            | --                     |
| No mutation identified in <i>ddn</i> , <i>fgd1</i> , <i>fibABC</i> . | 2 samples                             | >10                    |
| Wild Type H37Rv                                                      |                                       | <1                     |
